# Supplementary material for: Loading and release of fluorescent oligoarginine peptides into/from pH-responsive anionic supramolecular nanoparticles
Source: Royal Society of Chemistry journal article supplement (doi:10.1039/c6tb00933f), 2016-01-01
Supplement: c6tb00933f1.pdf [file c6tb00933f1.pdf]

## Supplementary information

# Loading and release of fluorescent oligoarginine peptides into/from pH-responsive anionic supramolecular nanoparticles

Laura Graña-Suárez,<sup>a</sup> Willem Verboom,<sup>\*a</sup> Tessa Buckle,<sup>b</sup> Mark Rood,<sup>b</sup> Fijis W. B. van Leeuwen<sup>b</sup> and Jurriaan Huskens<sup>\*a</sup>

<sup>a</sup> *Molecular Nanofabrication group, MESA+ Institute for Nanotechnology, University of Twente, P.O. Box 217, 7500 AE Enschede, The Netherlands*  
*E-mail: w.verboom@utwente.nl & j.huskens@utwente.nl; Fax: +31-534894645*

<sup>b</sup> *Interventional molecular Imaging laboratory, Department of Radiology, Leiden University Medical Centre, Leiden, The Netherlands*

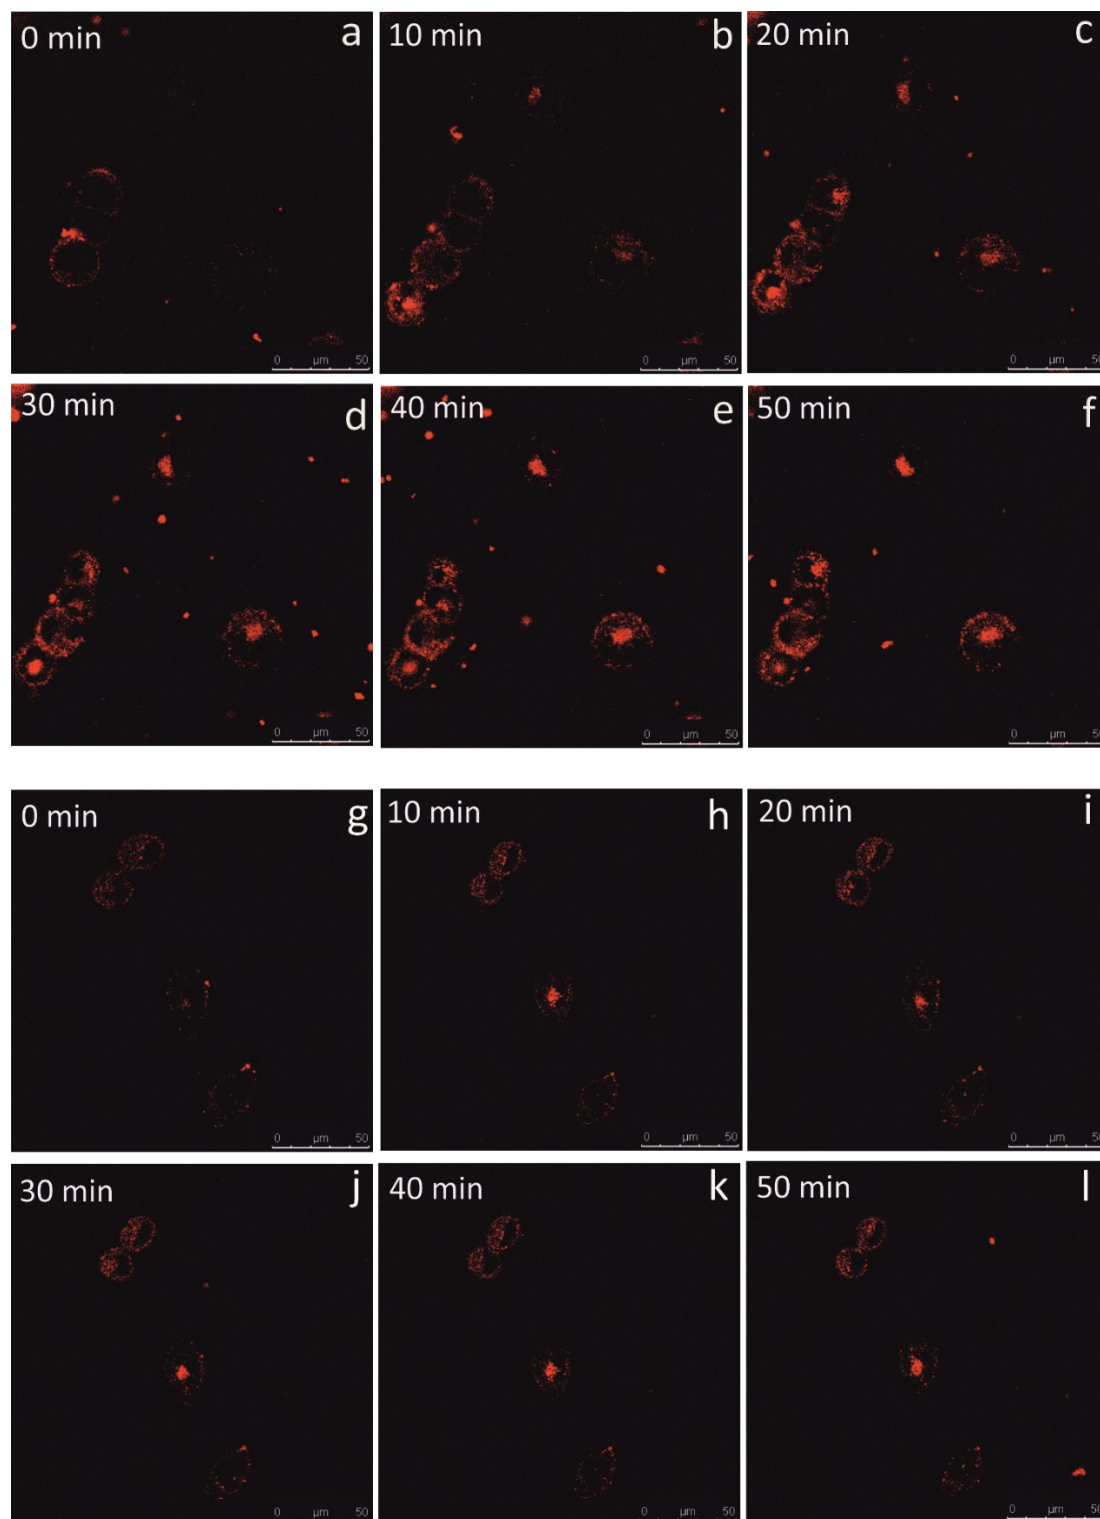

**Fig. S-1** Fluorescence imaging over time of Arg<sub>4</sub>Cy5 (excitation at 633 nm and emission at 650-700 nm) administered to PC3 prostate cancer cells. Arg<sub>4</sub>Cy5 (a-f) or Arg<sub>4</sub>Cy5-SNP assemblies (g-l) in PBS were added to the cells by replacing the cell culture medium. The SNPs were composed of PiBMA-CD-RhB (0.16 μM CD, 0.05 μM RhB), PiBMA-CD (0.54 μM CD), and PiBMA-TBP (0.7 μM TBP). The concentration of Arg<sub>4</sub>Cy5 was 19 μM.

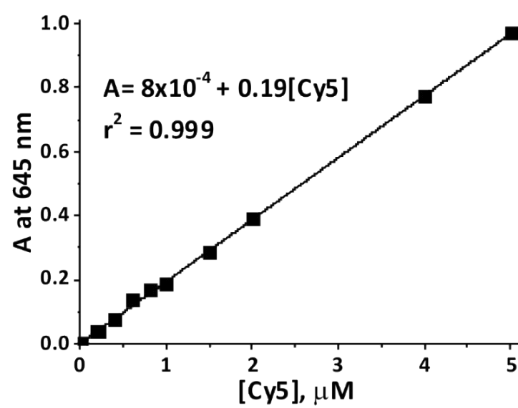

Fig. S-2 Calibration curve Cy5.
